# Supplementary material
Source: HighWire-hosted journal article supplement (http://www.qdcxjkg.com/highwire/filestream/132451/field_highwire_adjunct_files/0/ERJ-000378-2016_Supplementary_material.pdf)
Supplement: ERJ-000378-2016_Supplementary_material.pdf [file ERJ-000378-2016_Supplementary_material.pdf]

## **Surgical lung biopsy for the diagnosis of interstitial lung disease in England: 1997-2008**

### **Supplementary material**

#### **Additional methods**

##### **Selection of codes for interstitial lung disease**

###### ICD-10 codes

J84.1 – Other interstitial pulmonary diseases with fibrosis

J84.8 – Other specified interstitial pulmonary diseases

J84.9 – interstitial pulmonary disease, unspecified

D86.0 – sarcoidosis of lung

J67.9 – hypersensitivity pneumonitis due to unspecified organic dust

J99.0 – rheumatoid lung disease

J99.1 – respiratory disorders in other diffuse connective tissue disorders

ICD-9 codes – used for initial search, but not required as admissions prior to 1997 featuring these codes were dropped

515 – Post-inflammatory pulmonary fibrosis

5163 – Idiopathic fibrosing alveolitis

517.2 – Lung involvement in systemic sclerosis

517.8 – lung involvement in other diseases classified elsewhere

##### **Exclusion of patients where surgical lung biopsy was not the primary operation coded**

The Hospital Episodes Statistics dataset contains records for up to 24 procedures carried out during an inpatient episode. The first operation record is generally the main or most resource intensive procedure. We initially identified all patients with *any* record for a surgical lung biopsy. In the vast majority of cases this was coded as the primary operation, but in some cases it was coded as the second or subsequent operation. In some of these cases, it was clear that surgical lung biopsy was the most significant procedure, despite not being coded in the primary position.

All patients where surgical lung biopsy was not listed as the primary operation were therefore hand-reviewed by two clinicians to determine if it seemed to be the main procedure or not. Those records where the surgical lung biopsy was likely to be the main procedure were retained, as were those

where the surgical lung biopsy seemed a reasonable 'secondary' procedure - for example, alongside a cardiac operation, where a lung biopsy might be performed at the same time. Any cases where there was doubt about the nature of the biopsy - for example, where the primary code was for biopsy of pleural lesion - were excluded.

### Details of distinction between 'elective' and 'non-elective' operations

The Hospital Episodes Statistics dataset contains a variable specifying whether procedures are elective or non-elective ('admission method') but this was not available in our extract. We therefore used the 'waiting time' variable as a surrogate: this gives the length of time between the 'decision to admit' and the actual admission date. This variable was only valid for elective admissions: when it was missing, we assumed this was a non-elective admission. These records either had no valid decision-to-admit date or a decision-to-admit date that was identical to the admission date.

### Figure S1

How to calculate the updated Charlson score (used with permission of Oxford University Press).

| Co-morbidity                                          | Score |
|-------------------------------------------------------|-------|
| Chronic pulmonary disease                             | 1     |
| Rheumatologic disease                                 | 1     |
| Renal disease                                         | 1     |
| Diabetes with chronic complications                   | 1     |
| Congestive heart failure                              | 2     |
| Dementia                                              | 2     |
| Mild liver disease*                                   | 2     |
| Hemiplegia or paraplegia                              | 2     |
| Any malignancy†<br>(including leukaemia and lymphoma) | 2     |
| Moderate or severe liver disease*                     | 4     |
| AIDS/HIV                                              | 4     |
| Metastatic solid tumour†                              | 6     |

\*Patients can score for either 'mild liver disease' or 'moderate to severe liver disease'

†Patients can score for either 'any malignancy' or 'metastatic solid tumour'

Quan H *et al.* Updating and Validating the Charlson Comorbidity Index and Score for Risk Adjustment in Hospital Discharge Abstracts Using Data from 6 Countries. *Am J Epidemiol* 2011; 173: 676-682

## Additional results

**Table S1 – Number of biopsies per region**

| Region             | Number of cases (%) | Person-years*      | Biopsies per 100,000 population | Crude incidence of IPF per 100,000 |
|--------------------|---------------------|--------------------|---------------------------------|------------------------------------|
| East Midlands      | 136 (4.8)           | 51,073,100         | 0.27                            | 3.92                               |
| East of England    | 378 (13.4)          | 65,629,300         | 0.58                            | 4.75                               |
| London             | 356 (12.6)          | 88,620,000         | 0.40                            | 3.68                               |
| North East         | 154 (5.5)           | 30,615,400         | 0.50                            | 5.66                               |
| North West         | 315 (11.2)          | 82,006,200         | 0.38                            | 5.76                               |
| South East         | 307 (10.9)          | 97,228,900         | 0.32                            | 3.55                               |
| South West         | 446 (15.8)          | 60,020,800         | 0.74                            | 5.89                               |
| West Midlands      | 266 (9.4)           | 64,073,400         | 0.42                            | 4.77                               |
| Yorkshire & Humber | 414 (14.7)          | 60,501,700         | 0.68                            | 3.52                               |
| Other / Unknown †  | 48 (1.7)            | -                  | -                               | -                                  |
| <b>OVERALL</b>     | <b>2,820 (100)</b>  | <b>599,768,800</b> | <b>0.47</b>                     | <b>4.6‡</b>                        |

\*Person-years: this was calculated by adding together mid-year population estimates for each region for each year from 1997-2008, rounded to the nearest hundred persons – for example, the mid-year population estimate for the East Midlands for 1997 was 4.1 million, rising to 4.4 million in 2008, giving a cumulative total of 51 million person-years as shown above. Population statistics from the Office of National Statistics, accessed November 2015 from <http://www.ons.gov.uk/ons/publications/re-reference-tables.html?edition=tcm%3A77-162632> and <http://www.ons.gov.uk/ons/publications/re-reference-tables.html?edition=tcm%3A77-315018>.

Biopsies per 100,000 calculated by dividing cases by person-years for each region, then multiplying by 100,000.

† 'Other' includes patients with a postcode from Scotland or Wales who attended English hospitals.

‡ Overall incidence across *United Kingdom* (ie including Scotland/Wales/N Ireland). Data from Gribbin *et al* (2006) Incidence and mortality of idiopathic pulmonary fibrosis and sarcoidosis in the UK. *Thorax*. 61:980-985. doi: 10.1136/thx.2006.062836.

**Table S2– Multivariable analysis – associations with death within 30 days of surgical lung biopsy for interstitial lung disease**

| Variables                     | Cases | Deaths | Unadjusted Odds Ratio (95% CI) | p value       | Adjusted Odds Ratio (95% CI) | p value       |
|-------------------------------|-------|--------|--------------------------------|---------------|------------------------------|---------------|
| <b>Sex</b>                    |       |        |                                |               |                              |               |
| Female                        | 1,274 | 24     | 1.00                           |               | 1.00                         |               |
| Male                          | 1,546 | 44     | 1.53 (0.92-2.52)               | 0.094         | 1.40 (0.83-2.35)             | 0.205         |
| <b>Age</b>                    |       |        |                                |               |                              |               |
| <44 yrs                       | 576   | 6      | 1.00                           | <0.001        | 1.00                         | <0.001        |
| 45-54 yrs                     | 636   | 12     | 1.83 (0.68-4.90)               | (p for trend) | 1.64 (0.61-4.43)             | (p for trend) |
| 55-64 yrs                     | 843   | 16     | 1.84 (0.71-4.73)               |               | 1.53 (0.59-3.97)             |               |
| 65-74 yrs                     | 588   | 21     | 3.52 (1.41-8.78)               |               | 2.96 (1.18-7.46)             |               |
| >74 yrs                       | 177   | 13     | 7.53 (2.82-20.12)              |               | 5.23 (1.90-14.39)            |               |
| <b>Updated Charlson score</b> |       |        |                                |               |                              |               |
| 0                             | 1,947 | 45     | 1.00                           | 0.042         | 1.00                         | 0.039         |
| 1                             | 717   | 13     | 0.78 (0.42-1.46)               | (p for trend) | 0.85 (0.43-1.68)             | (p for trend) |
| 2                             | 116   | 6      | 2.31 (0.96-5.52)               |               | 1.93 (0.79-4.75)             |               |
| 3 or more                     | 40    | *      | 4.70 (1.60-13.75)              |               | 4.80 (1.58-14.54)            |               |
| <b>IMD score</b>              | 2,760 | 67     | 1.00 (0.98-1.02)               | 0.985         | 1.00 (0.99-1.02)             | 0.841         |
| <b>Type of operation</b>      |       |        |                                |               |                              |               |
| VATS                          | 703   | 11     | 1.00                           | 0.154         | 1.00                         | 0.181         |
| Open                          | 362   | 12     | 2.16 (0.94-4.94)               |               | 2.14 (0.89-5.15)             |               |
| Unclear or not specified      | 1,755 | 45     | 1.66 (0.85-3.22)               |               | 1.72 (0.85-3.49)             |               |
| <b>Provisional diagnosis</b>  |       |        |                                |               |                              |               |
| J84.1                         | 1,433 | 47     | 1.00                           | 0.142         | 1.00                         | 0.499         |
| J84.9                         | 812   | 15     | 0.56 (0.31-1.00)               |               | 0.66 (0.36-1.20)             |               |
| J84.8                         | 99    | *      | 0.30 (0.04-2.20)               |               | 0.37 (0.05-2.75)             |               |
| RA-ILD                        | 16    | 0      | -                              |               | -                            |               |
| CTD-ILD                       | 38    | *      | 1.64 (0.38-7.01)               |               | 1.48 (0.34-6.55)             |               |
| HP                            | 162   | *      | 0.56 (0.17-1.81)               |               | 0.84 (0.23-3.05)             |               |
| Sarcoidosis                   | 260   | 0      | -                              |               | -                            |               |

‘\*’ in this table means a number between 1 and 5 – small numbers hidden to aid confidentiality.

Higher updated Charlson score reflects greater degree of co-morbidity.

IMD: index of multiple deprivation (lower score = least deprived); VATS: video-assisted thoracoscopic surgery; J84.1: other interstitial pulmonary disease with fibrosis; J84.9: interstitial pulmonary disease, unspecified; J84.8: other specified interstitial pulmonary disease; RA-ILD (J99.0): rheumatoid lung disease; CTD-ILD (J99.1): respiratory disorders in other diffuse connective tissue disorders; HP (J67.9): hypersensitivity pneumonitis due to unspecified organic dust; Sarcoidosis (D86.0): sarcoidosis of lung.

For type of operation, ‘unclear or not specified’ mainly reflects older data from before a specific code for VATS was available. These cases are likely to be a combination of open and VATS procedures, with increasing numbers of VATS in later years.

**Table S3– Multivariable analysis – associations with in-hospital death following surgical lung biopsy for interstitial lung disease**

| Variables                     | Cases | Deaths | Unadjusted Odds Ratio (95% CI) | p value       | Adjusted Odds Ratio (95% CI) | p value       |
|-------------------------------|-------|--------|--------------------------------|---------------|------------------------------|---------------|
| <b>Sex</b>                    |       |        |                                |               |                              |               |
| Female                        | 1,274 | 17     | 1.00                           |               | 1.00                         |               |
| Male                          | 1,546 | 30     | 1.46 (0.80-2.67)               | 0.207         | 1.29 (0.70-2.38)             | 0.414         |
| <b>Age</b>                    |       |        |                                |               |                              |               |
| <44 yrs                       | 576   | *      | 1.00                           | 0.002         | 1.00                         | 0.006         |
| 45-54 yrs                     | 636   | 9      | 2.05 (0.63-6.70)               | (p for trend) | 1.91 (0.58-6.31)             | (p for trend) |
| 55-64 yrs                     | 843   | 13     | 2.24 (0.73-6.90)               |               | 1.98 (0.64-6.15)             |               |
| 65-74 yrs                     | 588   | 14     | 3.49 (1.14-10.66)              |               | 3.10 (1.00-9.58)             |               |
| >74 yrs                       | 177   | 7      | 5.89 (1.70-20.35)              |               | 4.85 (1.37-17.11)            |               |
| <b>Updated Charlson score</b> |       |        |                                |               |                              |               |
| 0                             | 1,947 | 25     | 1.00                           | 0.002         | 1.00                         | 0.002         |
| 1                             | 717   | 14     | 1.53 (0.79-2.96)               | (p for trend) | 1.83 (0.91-3.68)             | (p for trend) |
| 2                             | 116   | *      | 3.46 (1.30-9.22)               |               | 2.94 (1.08-8.01)             |               |
| 3 or more                     | 40    | *      | 6.23 (1.80-21.56)              |               | 6.51 (1.82-23.26)            |               |
| <b>IMD score</b>              | 2,760 | 47     | 1.00 (0.98-1.02)               | 0.876         | 1.00 (0.98-1.02)             | 0.803         |
| <b>Type of operation</b>      |       |        |                                |               |                              |               |
| VATS                          | 703   | *      | 1.00                           | 0.011         | 1.00                         | 0.025         |
| Open                          | 362   | 9      | 4.46 (1.36-14.57)              |               | 3.89 (1.16-13.06)            |               |
| Unclear or not specified      | 1,755 | 34     | 3.45 (1.22-9.76)               |               | 3.31 (1.15-9.51)             |               |
| <b>Provisional diagnosis</b>  |       |        |                                |               |                              |               |
| J84.1                         | 1,433 | 34     | 1.00                           | 0.214         | 1.00                         | 0.508         |
| J84.9                         | 812   | 9      | 0.46 (0.22-0.97)               |               | 0.57 (0.27-1.21)             |               |
| J84.8                         | 99    | *      | 0.42 (0.06-3.10)               |               | 0.52 (0.07-3.86)             |               |
| RA-ILD                        | 16    | 0      | -                              |               | -                            |               |
| CTD-ILD                       | 38    | *      | 1.11 (0.15-8.34)               |               | 0.88 (0.11-6.75)             |               |
| HP                            | 162   | *      | 0.51 (0.12-2.16)               |               | 0.47 (0.10-2.13)             |               |
| Sarcoidosis                   | 260   | 0      | -                              |               | -                            |               |

‘\*’ in this table means a number between 1 and 5 – small numbers hidden to aid confidentiality.

Higher updated Charlson score reflects greater degree of co-morbidity.

IMD: index of multiple deprivation (lower score = least deprived); VATS: video-assisted thoracoscopic surgery; J84.1: other interstitial pulmonary disease with fibrosis; J84.9: interstitial pulmonary disease, unspecified; J84.8: other specified interstitial pulmonary disease; RA-ILD (J99.0): rheumatoid lung disease; CTD-ILD (J99.1): respiratory disorders in other diffuse connective tissue disorders; HP (J67.9): hypersensitivity pneumonitis due to unspecified organic dust; Sarcoidosis (D86.0): sarcoidosis of lung.

For type of operation, ‘unclear or not specified’ mainly reflects older data from before a specific code for VATS was available. These cases are likely to be a combination of open and VATS procedures, with increasing numbers of VATS in later years.

**Table S4– Multivariable analysis – associations with death within 90 days of surgical lung biopsy for interstitial lung disease – elective patients only**

| Variables                     | Cases | Deaths | Unadjusted Odds Ratio (95% CI) | p value       | Adjusted Odds Ratio (95% CI) | p value       |
|-------------------------------|-------|--------|--------------------------------|---------------|------------------------------|---------------|
| <b>Sex</b>                    |       |        |                                |               |                              |               |
| Female                        | 1,027 | 23     | 1.00                           |               | 1.00                         |               |
| Male                          | 1,250 | 40     | 1.44 (0.86-2.43)               | 0.161         | 1.31 (0.77-2.23)             | 0.321         |
| <b>Age</b>                    |       |        |                                |               |                              |               |
| <44 yrs                       | 444   | 8      | 1.00                           | 0.169         | 1.00                         | 0.408         |
| 45-54 yrs                     | 521   | 16     | 1.73 (0.73-4.07)               | (p for trend) | 1.42 (0.59-3.41)             | (p for trend) |
| 55-64 yrs                     | 702   | 20     | 1.60 (0.70-3.66)               |               | 1.32 (0.57-3.05)             |               |
| 65-74 yrs                     | 482   | 12     | 1.39 (0.56-3.44)               |               | 1.12 (0.45-2.79)             |               |
| >74 yrs                       | 128   | 7      | 3.15 (1.12-8.87)               |               | 2.33 (0.81-6.68)             |               |
| <b>Updated Charlson score</b> |       |        |                                |               |                              |               |
| 0                             | 1,617 | 43     | 1.00                           | 0.112         | 1.00                         | 0.036         |
| 1                             | 553   | 14     | 0.95 (0.52-1.75)               | (p for trend) | 1.21 (0.63-2.33)             | (p for trend) |
| 2                             | 79    | *      | 0.95 (0.23-4.00)               |               | 1.00 (0.24-4.27)             |               |
| 3 or more                     | 28    | *      | 6.10 (2.03-18.35)              |               | 7.20 (2.28-22.75)            |               |
| <b>IMD score</b>              | 2,226 | 62     | 0.99 (0.97-1.01)               | 0.288         | 0.99 (0.97-1.01)             | 0.223         |
| <b>Type of operation</b>      |       |        |                                |               |                              |               |
| VATS                          | 583   | 8      | 1.00                           | 0.036         | 1.00                         | 0.039         |
| Open                          | 275   | 8      | 2.15 (0.80-5.80)               |               | 1.87 (0.65-5.33)             |               |
| Unclear or not specified      | 1,419 | 47     | 2.46 (1.16-5.24)               |               | 2.49 (1.15-5.38)             |               |
| <b>Provisional diagnosis</b>  |       |        |                                |               |                              |               |
| J84.1                         | 1,151 | 40     | 1.00                           | 0.411         | 1.00                         | 0.568         |
| J84.9                         | 664   | 20     | 0.86 (0.50-1.49)               |               | 0.94 (0.53-1.66)             |               |
| J84.8                         | 81    | *      | 0.35 (0.05-2.56)               |               | 0.41 (0.06-3.05)             |               |
| RA-ILD                        | 12    | 0      | -                              |               | -                            |               |
| CTD-ILD                       | 26    | 0      | -                              |               | -                            |               |
| HP                            | 125   | *      | 0.45 (0.11-1.89)               |               | 0.47 (0.10-2.15)             |               |
| Sarcoidosis                   | 218   | 0      | -                              |               | -                            |               |

‘\*’ in this table means a number between 1 and 5 – small numbers hidden to aid confidentiality.

Higher updated Charlson score reflects greater degree of co-morbidity.

IMD: index of multiple deprivation (lower score = least deprived); VATS: video-assisted thoracoscopic surgery; J84.1: other interstitial pulmonary disease with fibrosis; J84.9: interstitial pulmonary disease, unspecified; J84.8: other specified interstitial pulmonary disease; RA-ILD (J99.0): rheumatoid lung disease; CTD-ILD (J99.1): respiratory disorders in other diffuse connective tissue disorders; HP (J67.9): hypersensitivity pneumonitis due to unspecified organic dust; Sarcoidosis (D86.0): sarcoidosis of lung.

For type of operation, ‘unclear or not specified’ mainly reflects older data from before a specific code for VATS was available. These cases are likely to be a combination of open and VATS procedures, with increasing numbers of VATS in later years.

For details on the distinction between ‘elective’ and ‘non-elective’ operations, see Additional Methods section.

**Table S5– Multivariable analysis – associations with death within 30 days of surgical lung biopsy for interstitial lung disease – elective patients only**

| Variables                     | Cases | Deaths | Unadjusted Odds Ratio (95% CI) | p value       | Adjusted Odds Ratio (95% CI) | p value       |
|-------------------------------|-------|--------|--------------------------------|---------------|------------------------------|---------------|
| <b>Sex</b>                    |       |        |                                |               |                              |               |
| Female                        | 1,027 | 13     | 1.00                           |               | 1.00                         |               |
| Male                          | 1,250 | 21     | 1.33 (0.66-2.67)               | 0.415         | 1.31 (0.64-2.67)             | 0.456         |
| <b>Age</b>                    |       |        |                                |               |                              |               |
| <44 yrs                       | 444   | *      | 1.00                           | 0.552         | 1.00                         | 0.860         |
| 45-54 yrs                     | 521   | 11     | 2.37 (0.75-7.50)               | (p for trend) | 2.09 (0.65-6.67)             | (p for trend) |
| 55-64 yrs                     | 702   | 10     | 1.59 (0.50-5.10)               |               | 1.31 (0.41-4.25)             |               |
| 65-74 yrs                     | 482   | *      | 1.15 (0.31-4.32)               |               | 0.94 (0.25-3.58)             |               |
| >74 yrs                       | 128   | *      | 3.55 (0.87-14.39)              |               | 2.74 (0.66-11.42)            |               |
| <b>Updated Charlson score</b> |       |        |                                |               |                              |               |
| 0                             | 1,617 | 22     | 1.00                           | 0.064         | 1.00                         | 0.046         |
| 1                             | 553   | 8      | 1.06 (0.47-2.40)               | (p for trend) | 1.15 (0.47-2.84)             | (p for trend) |
| 2                             | 79    | *      | 0.93 (0.12-6.98)               |               | 0.96 (0.13-7.31)             |               |
| 3 or more                     | 28    | *      | 8.70 (2.44-30.96)              |               | 9.33 (2.50-34.85)            |               |
| <b>IMD score</b>              | 2,226 | 34     | 0.99 (0.97-1.02)               | 0.609         | 0.99 (0.97-1.02)             | 0.476         |
| <b>Type of operation</b>      |       |        |                                |               |                              |               |
| VATS                          | 583   | *      | 1.00                           | 0.279         | 1.00                         | 0.281         |
| Open                          | 275   | *      | 1.71 (0.45-6.40)               |               | 1.76 (0.46-6.84)             |               |
| Unclear or not specified      | 1,419 | 25     | 2.07 (0.79-5.44)               |               | 2.11 (0.79-5.66)             |               |
| <b>Provisional diagnosis</b>  |       |        |                                |               |                              |               |
| J84.1                         | 1,151 | 20     | 1.00                           | 0.987         | 1.00                         | 0.995         |
| J84.9                         | 664   | 11     | 0.95 (0.45-2.00)               |               | 1.09 (0.51-2.33)             |               |
| J84.8                         | 81    | *      | 0.71 (0.09-5.33)               |               | 0.87 (0.11-6.68)             |               |
| RA-ILD                        | 12    | 0      | -                              |               | -                            |               |
| CTD-ILD                       | 26    | 0      | -                              |               | -                            |               |
| HP                            | 125   | *      | 0.92 (0.21-3.98)               |               | 1.00 (0.20-5.05)             |               |
| Sarcoidosis                   | 218   | 0      | -                              |               | -                            |               |

‘\*’ in this table means a number between 1 and 5 – small numbers hidden to aid confidentiality.

Higher updated Charlson score reflects greater degree of co-morbidity.

IMD: index of multiple deprivation (lower score = least deprived); VATS: video-assisted thoracoscopic surgery; J84.1: other interstitial pulmonary disease with fibrosis; J84.9: interstitial pulmonary disease, unspecified; J84.8: other specified interstitial pulmonary disease; RA-ILD (J99.0): rheumatoid lung disease; CTD-ILD (J99.1): respiratory disorders in other diffuse connective tissue disorders; HP (J67.9): hypersensitivity pneumonitis due to unspecified organic dust; Sarcoidosis (D86.0): sarcoidosis of lung.

For type of operation, ‘unclear or not specified’ mainly reflects older data from before a specific code for VATS was available. These cases are likely to be a combination of open and VATS procedures, with increasing numbers of VATS in later years.

For details on the distinction between ‘elective’ and ‘non-elective’ operations, see Additional Methods section.

**Table S6– Multivariable analysis – associations with in-hospital death following surgical lung biopsy for interstitial lung disease – elective patients only**

| Variables                       | Cases | Deaths | Unadjusted Odds Ratio (95% CI) | p value       | Adjusted Odds Ratio (95% CI) | p value       |
|---------------------------------|-------|--------|--------------------------------|---------------|------------------------------|---------------|
| <b>Sex</b>                      |       |        |                                |               |                              |               |
| Female                          | 1,027 | 10     | 1.00                           |               | 1.00                         |               |
| Male                            | 1,250 | 12     | 0.99 (0.42-2.29)               | 0.974         | 1.00 (0.42-2.37)             | 0.998         |
| <b>Age</b>                      |       |        |                                |               |                              |               |
| <44 yrs                         | 444   | *      | 1.00                           | 0.522         | 1.00                         | 0.670         |
| 45-54 yrs                       | 521   | 7      | 3.01 (0.62-14.56)              | (p for trend) | 2.59 (0.53-12.71)            | (p for trend) |
| 55-64 yrs                       | 702   | 7      | 2.23 (0.46-10.76)              |               | 1.95 (0.40-9.51)             |               |
| 65-74 yrs                       | 482   | *      | 1.85 (0.34-10.15)              |               | 1.54 (0.28-8.59)             |               |
| >74 yrs                         | 128   | *      | 3.51 (0.49-25.15)              |               | 3.05 (0.41-22.67)            |               |
| <b>Updated Charlson score</b>   |       |        |                                |               |                              |               |
| 0                               | 1,617 | 11     | 1.00                           | 0.011         | 1.00                         | 0.007         |
| 1                               | 553   | 8      | 2.14 (0.86-5.36)               | (p for trend) | 2.73 (1.04-7.16)             | (p for trend) |
| 2                               | 79    | *      | 1.87 (0.24-14.68)              |               | 2.04 (0.25-16.34)            |               |
| 3 or more                       | 28    | *      | 11.23 (2.37-53.21)             |               | 11.81 (2.36-59.01)           |               |
| <b>IMD score</b>                | 2,226 | 22     | 1.00 (0.97-1.03)               | 0.894         | 0.99 (0.97-1.02)             | 0.715         |
| <b>Type of operation</b>        |       |        |                                |               |                              |               |
| VATS                            | 583   | *      | 1.00                           | 0.102         | 1.00                         | 0.083         |
| Open                            | 275   | *      | 2.13 (0.30-15.19)              |               | 2.15 (0.29-15.85)            |               |
| <i>Unclear or not specified</i> | 1,419 | 18     | 3.73 (0.86-16.14)              |               | 4.02 (0.91-17.76)            |               |
| <b>Provisional diagnosis</b>    |       |        |                                |               |                              |               |
| J84.1                           | 1,151 | 14     | 1.00                           | 0.916         | 1.00                         | 0.824         |
| J84.9                           | 664   | 6      | 0.74 (0.28-1.94)               |               | 0.87 (0.33-2.33)             |               |
| J84.8                           | 81    | *      | 1.02 (0.13-7.82)               |               | 1.21 (0.15-9.59)             |               |
| RA-ILD                          | 12    | 0      | -                              |               | -                            |               |
| CTD-ILD                         | 26    | 0      | -                              |               | -                            |               |
| HP                              | 125   | *      | 0.65 (0.09-5.02)               |               | 0.41 (0.05-3.43)             |               |
| Sarcoidosis                     | 218   | 0      | -                              |               | -                            |               |

\*\* in this table means a number between 1 and 5 – small numbers hidden to aid confidentiality. Higher updated Charlson score reflects greater degree of co-morbidity.

IMD: index of multiple deprivation (lower score = least deprived); VATS: video-assisted thoracoscopic surgery; J84.1: other interstitial pulmonary disease with fibrosis; J84.9: interstitial pulmonary disease, unspecified; J84.8: other specified interstitial pulmonary disease; RA-ILD (J99.0): rheumatoid lung disease; CTD-ILD (J99.1): respiratory disorders in other diffuse connective tissue disorders; HP (J67.9): hypersensitivity pneumonitis due to unspecified organic dust; Sarcoidosis (D86.0): sarcoidosis of lung.

For type of operation, 'unclear or not specified' mainly reflects older data from before a specific code for VATS was available. These cases are likely to be a combination of open and VATS procedures, with increasing numbers of VATS in later years.

For details on the distinction between 'elective' and 'non-elective' operations, see Additional Methods section.



**Table S7– Multivariable analysis – associations with death within 90 days of surgical lung biopsy for interstitial lung disease – data from 2005-2008 only**

| Variables                     | Cases | Deaths | Unadjusted Odds Ratio (95% CI) | p value       | Adjusted Odds Ratio (95% CI) | p value       |
|-------------------------------|-------|--------|--------------------------------|---------------|------------------------------|---------------|
| <b>Sex</b>                    |       |        |                                |               |                              |               |
| Female                        | 568   | 17     | 1.00                           |               | 1.00                         |               |
| Male                          | 667   | 23     | 1.16 (0.61-2.19)               | 0.652         | 0.96 (0.49-1.90)             | 0.905         |
| <b>Age</b>                    |       |        |                                |               |                              |               |
| <44 yrs                       | 243   | *      | 1.00                           | 0.001         | 1.00                         | 0.010         |
| 45-54 yrs                     | 255   | *      | 0.95 (0.27-3.33)               | (p for trend) | 0.93 (0.26-3.32)             | (p for trend) |
| 55-64 yrs                     | 373   | 11     | 1.45 (0.50-4.22)               |               | 1.46 (0.49-4.38)             |               |
| 65-74 yrs                     | 281   | 9      | 1.58 (0.52-4.76)               |               | 1.50 (0.48-4.69)             |               |
| >74 yrs                       | 83    | 10     | 6.52 (2.16-19.69)              |               | 4.97 (1.53-16.19)            |               |
| <b>Updated Charlson score</b> |       |        |                                |               |                              |               |
| 0                             | 798   | 26     | 1.00                           | 0.192         | 1.00                         | 0.077         |
| 1                             | 366   | 9      | 0.75 (0.35-1.61)               | (p for trend) | 1.05 (0.47-2.31)             | (p for trend) |
| 2                             | 45    | *      | 0.67 (0.09-5.09)               |               | 0.62 (0.08-4.84)             |               |
| 3 or more                     | 26    | *      | 5.40 (1.74-16.79)              |               | 6.87 (2.02-23.39)            |               |
| <b>IMD score</b>              | 1,196 | 39     | 1.00 (0.97-1.02)               | 0.733         | 1.00 (0.97-1.02)             | 0.819         |
| <b>Type of operation</b>      |       |        |                                |               |                              |               |
| VATS                          | 631   | 14     | 1.00                           | 0.071         | 1.00                         | 0.119         |
| Open                          | 137   | 8      | 2.73 (1.12-6.65)               |               | 2.60 (1.01-6.71)             |               |
| Unclear or not specified      | 467   | 18     | 1.77 (0.87-3.59)               |               | 1.74 (0.83-3.67)             |               |
| <b>Provisional diagnosis</b>  |       |        |                                |               |                              |               |
| J84.1                         | 548   | 25     | 1.00                           | 0.128         | 1.00                         | 0.531         |
| J84.9                         | 459   | 14     | 0.66 (0.34-1.28)               |               | 0.83 (0.41-1.68)             |               |
| J84.8                         | 43    | 0      | -                              |               | -                            |               |
| RA-ILD                        | *     | 0      | -                              |               | -                            |               |
| CTD-ILD                       | 14    | 0      | -                              |               | -                            |               |
| HP                            | 73    | 0      | -                              |               | -                            |               |
| Sarcoidosis                   | 93    | *      | 0.23 (0.03-1.70)               |               | 0.38 (0.05-2.92)             |               |

‘\*’ in this table means a number between 1 and 5 – small numbers hidden to aid confidentiality.

Higher updated Charlson score reflects greater degree of co-morbidity.

IMD: index of multiple deprivation (lower score = least deprived); VATS: video-assisted thoracoscopic surgery; J84.1: other interstitial pulmonary disease with fibrosis; J84.9: interstitial pulmonary disease, unspecified; J84.8: other specified interstitial pulmonary disease; RA-ILD (J99.0): rheumatoid lung disease; CTD-ILD (J99.1): respiratory disorders in other diffuse connective tissue disorders; HP (J67.9): hypersensitivity pneumonitis due to unspecified organic dust; Sarcoidosis (D86.0): sarcoidosis of lung.

For type of operation, ‘unclear or not specified’ mainly reflects older data from before a specific code for VATS was widely used. These cases are likely to be a combination of open and VATS procedures, with increasing numbers of VATS in later years.

**Table S8 – Cox regression model for survival following surgical lung biopsy for ILD**  
**(multivariable model adjusted for gender, age, updated Charlson score and type of operation)**

| <b>Variables</b>                | <b>Number of deaths / total</b> | <b>Hazard Ratio<br/>(95% CI)</b> | <b>p value</b> |
|---------------------------------|---------------------------------|----------------------------------|----------------|
| <b>Gender</b>                   |                                 |                                  |                |
| Female                          | 331 / 1,274                     | 1.00                             |                |
| Male                            | 577 / 1,546                     | 1.52 (1.33-1.74)                 | <0.001         |
| <b>Age</b>                      |                                 |                                  |                |
| <44 yrs                         | 78 / 576                        | 1.00                             | <0.001         |
| 45-54 yrs                       | 167 / 636                       | 2.14 (1.63-2.80)                 | (p for trend)  |
| 55-64 yrs                       | 295 / 843                       | 3.17 (2.47-4.07)                 |                |
| 65-74 yrs                       | 263 / 588                       | 4.80 (3.73-6.19)                 |                |
| >74 yrs                         | 105 / 177                       | 7.27 (5.41-9.77)                 |                |
| <b>Updated Charlson score</b>   |                                 |                                  |                |
| 0                               | 640 / 1,947                     | 1.00                             | 0.029          |
| 1                               | 200 / 717                       | 0.92 (0.78-1.08)                 | (p for trend)  |
| 2                               | 48 / 116                        | 1.40 (1.04-1.88)                 |                |
| 3 or more                       | 20 / 40                         | 2.25 (1.44-3.52)                 |                |
| <b>Type of operation</b>        |                                 |                                  |                |
| VATS                            | 99 / 703                        | 1.00                             | <0.001         |
| Open                            | 133 / 362                       | 1.61 (1.23-2.09)                 |                |
| <i>Unclear or not specified</i> | 676 / 1,755                     | 1.57 (1.26-1.96)                 |                |

Higher updated Charlson score reflects greater degree of co-morbidity.

VATS: video-assisted thoracoscopic surgery

For type of operation, 'unclear or not specified' mainly reflects older data from before a specific code for VATS was available. These cases are likely to be a combination of open and VATS procedures, with increasing numbers of VATS in later years.

## Thoracic Surgical Centres in England

We could not find a clear definitive universal data source for the number of thoracic surgical centres in England, as there are discrepancies between terminology: one National Health Service trust may run two hospitals; should these be counted as one or two centres? We compiled the following list of centres for our raw estimate of average numbers of procedures per centre.

### Southwest

Bristol Royal Infirmary  
Derriford, Plymouth  
Royal Devon and Exeter

### London

Barts and London Chest  
Royal Brompton & Harefield  
Imperial - Hammersmith  
UCL  
Guys  
Kings  
St George's

### Southeast

Southampton General  
John Radcliffe, Oxford

### East of England

Norwich and Norfolk  
Papworth, Cambridge  
Essex Cardiothoracic Centre

### East Midlands

Nottingham City Hospital  
Glenfield, Leicester

### West Midlands

Heart of England, Birmingham  
New Cross, Wolverhampton  
University Hospital Coventry and Warwick  
Royal Stoke, Stoke-on-Trent

### Yorkshire and the Humber

Northern General, Sheffield  
St James's, Leeds  
Castle Hill, Hull

### Northwest

Liverpool Heart and Chest  
UHSM, Manchester  
Victoria Hospital, Blackpool

### Northeast

Freeman, Newcastle  
James Cook, Middlesbrough
